# Supplementary material for: Design and synthesis of unnatural coordination glycopolymer particles (CGPs): unleashing the potential of catechol-saccharide derivatives
Source: Royal Society of Chemistry journal article supplement (doi:10.1039/d3ra05316d), 2023-01-01
Supplement: d3ra05316d1.pdf [file d3ra05316d1.pdf]

Supporting Information for

**Design and synthesis of Unnatural Coordination Glycopolymer Particles (CGPs): unleashing the potential of catechol-saccharide derivatives.**

Celina Bideplán-Moyano, Marcos J. Lo Fiego, Juan José Calmels, Belén Alonso, Gabriel Radivoy, Daniel Ruiz-Molina, Juan Mancebo-Aracil\* and Fabiana Nador\*

Index

|                                                                                 |           |
|---------------------------------------------------------------------------------|-----------|
| <b>S1. Secondary products obtained after methanolysis.....</b>                  | <b>2</b>  |
| <b>S2. UV-Vis of compound 4a .....</b>                                          | <b>3</b>  |
| <b>S3. IR spectra .....</b>                                                     | <b>3</b>  |
| <b>S4. SEM and EDX of CGPs .....</b>                                            | <b>4</b>  |
| <b>S5. DLS and Zeta Potential of CGPs samples in different conditions .....</b> | <b>5</b>  |
| <b>S6. Characterization of compounds 1 .....</b>                                | <b>7</b>  |
| <b>S7. Characterization of compounds 2 .....</b>                                | <b>9</b>  |
| <b>S8. Characterization of compounds 3 .....</b>                                | <b>17</b> |
| <b>S9. Characterization of compounds 4 .....</b>                                | <b>20</b> |

## S1. Secondary products obtained after methanolysis

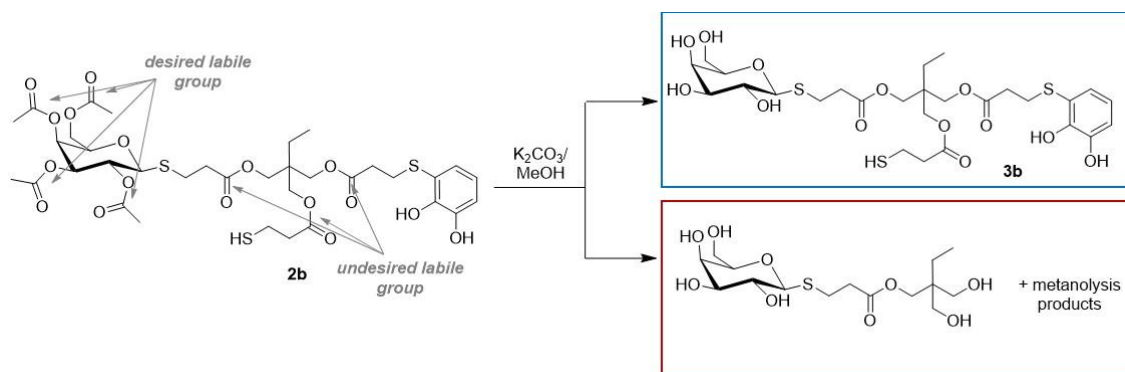

**Figure S1.** Secondary products obtained after methanolysis under  $K_2CO_3/MeOH$  conditions.

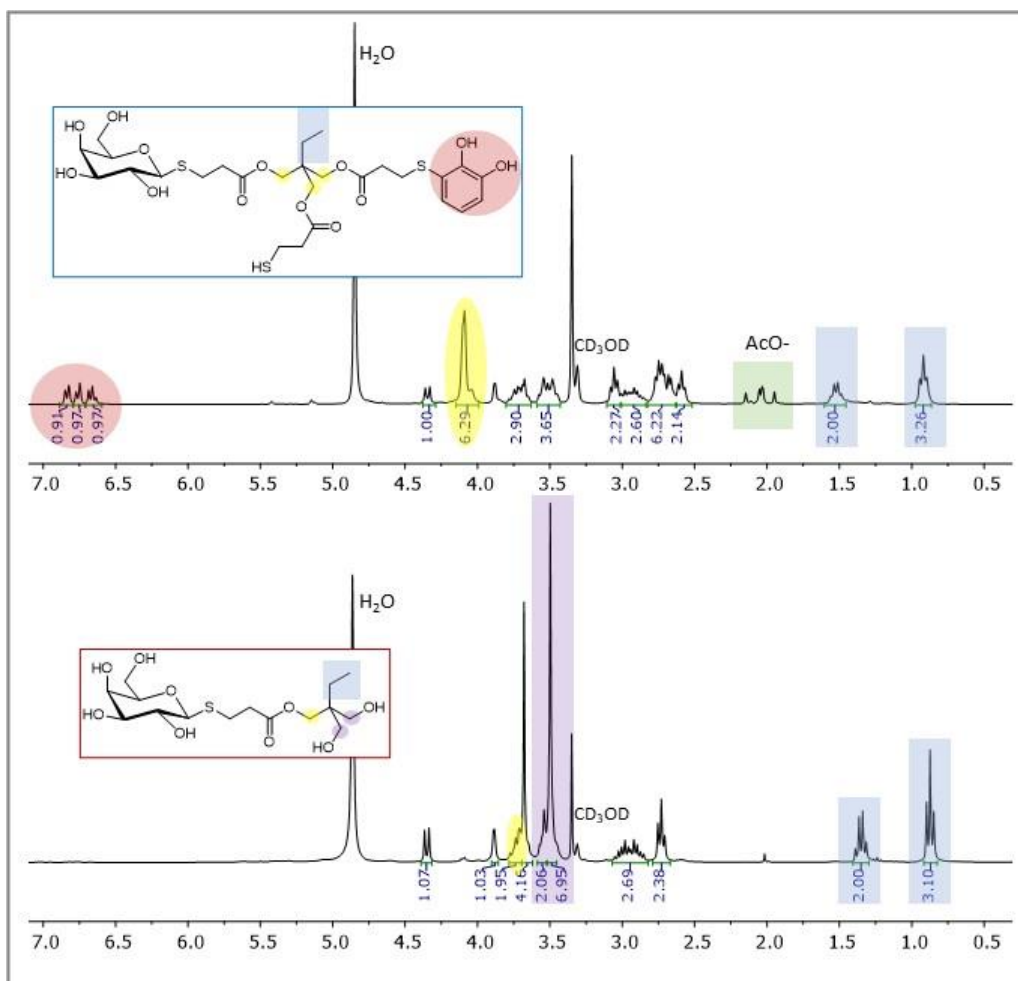

**Figure S2.** Comparison of  $^1H$  NMR of **3b** and secondary products obtained after methanolysis.

## S2. UV-Vis of compound 4a

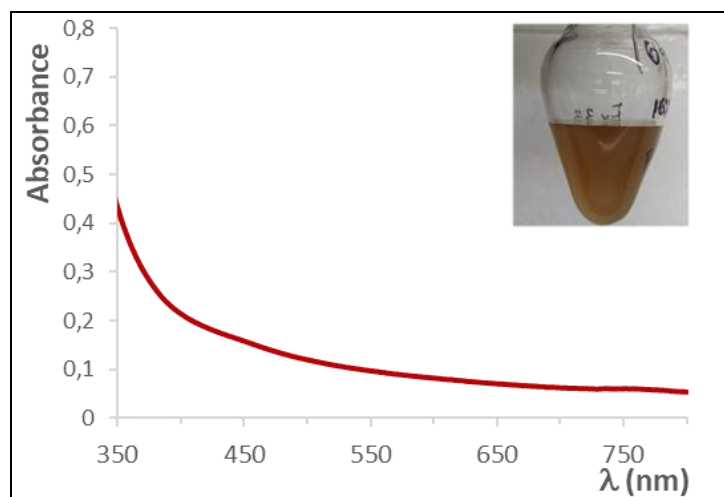

**Figure S3.** UV-Vis spectra of compound 4a were obtained in the same medium used for the preparation of CGPs, but in the absence of Fe(III), after 24 hours.

## S3. IR spectra

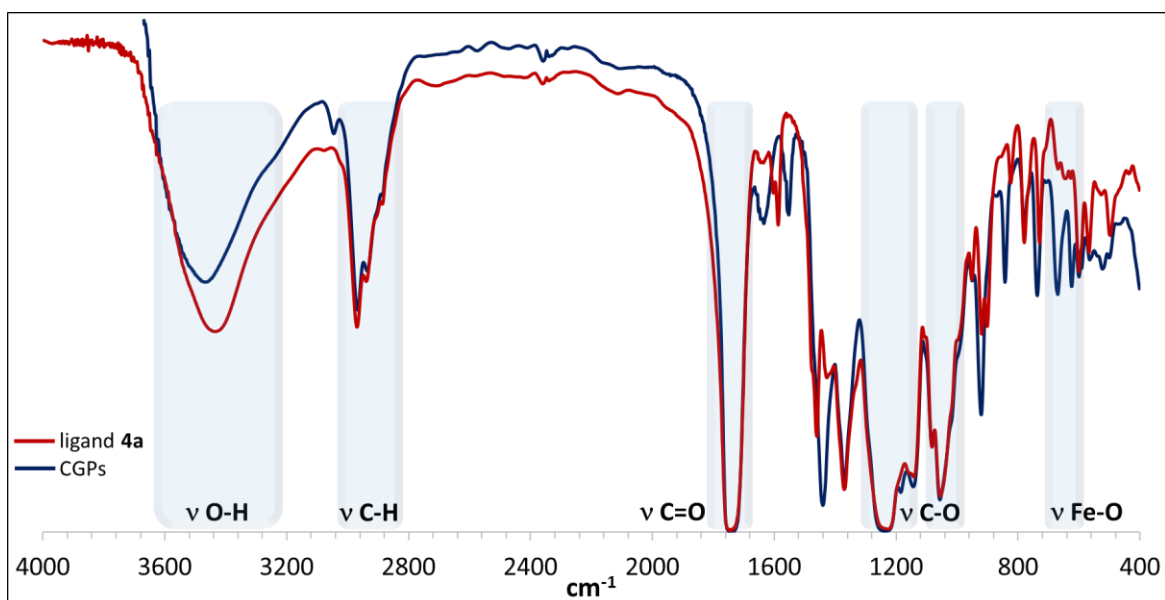

**Figure S4.** Full IR spectra (KBr) of ligand 4a and CGPs.

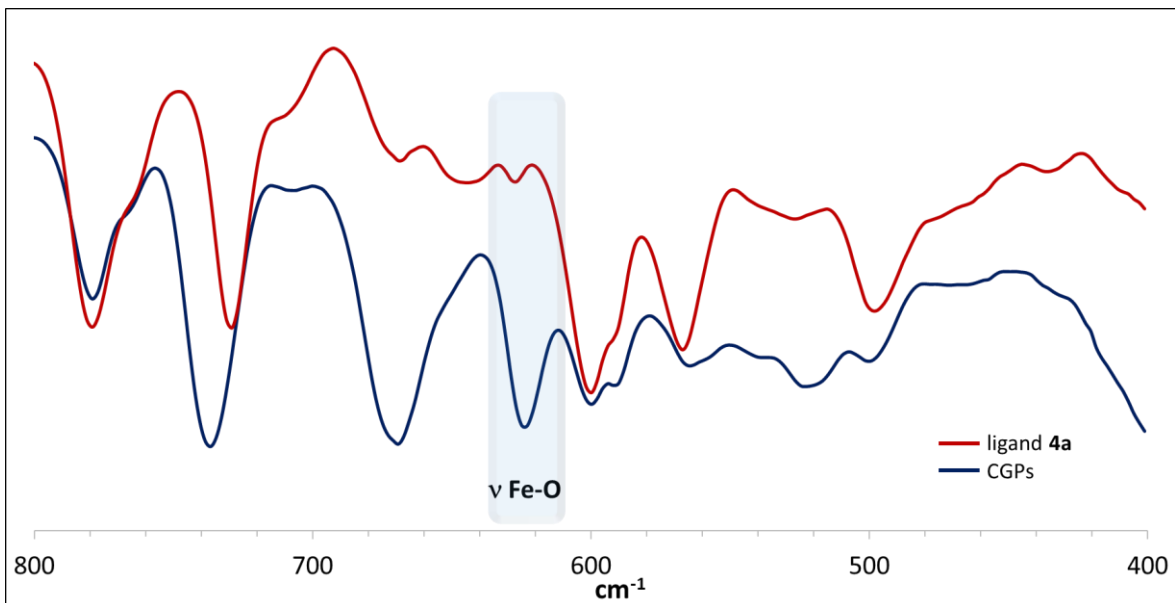

Figure S5. IR spectra (KBr) of ligand **4a** and CGPs in the 400-800  $\text{cm}^{-1}$  region.

#### S4. SEM and EDX of CGPs

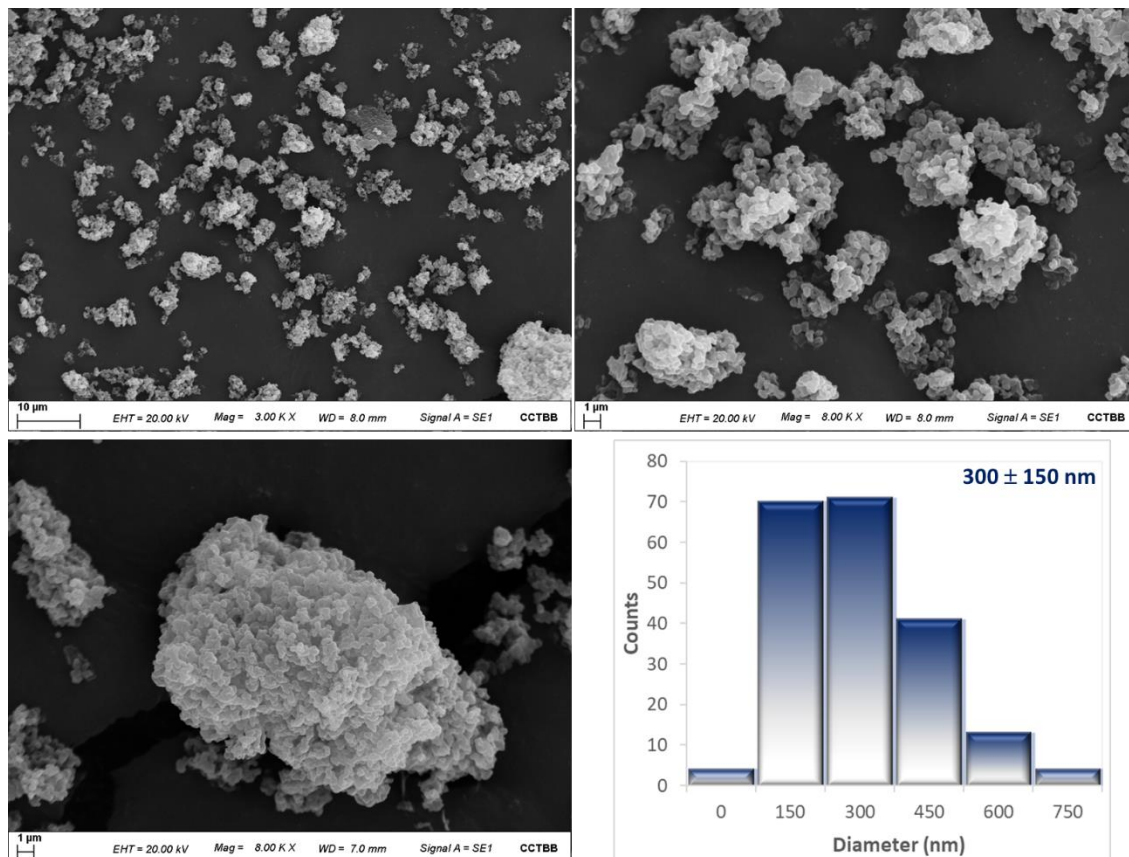

Figure S6. SEM images of CGPs and size distribution histogram.

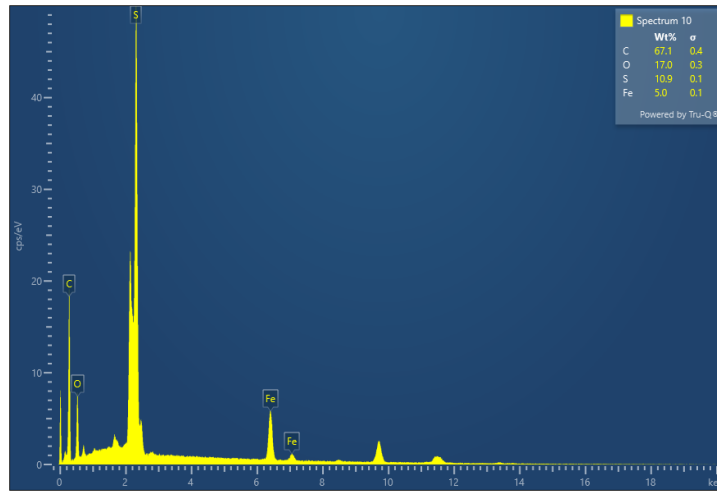

Figure S7. EDX spectrum of CGPs.

S5. DLS and Zeta Potential of CGPs samples in different conditions

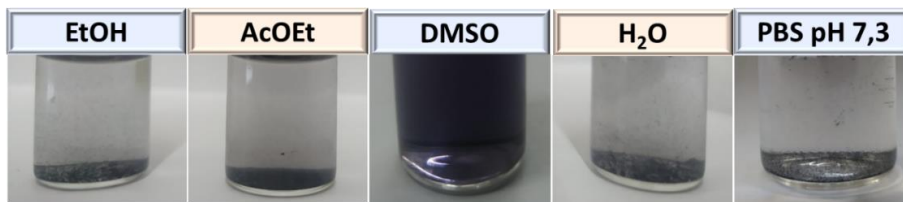

Figure S8. CGPs solutions in EtOH, AcOEt, DMSO, H<sub>2</sub>O and PBS buffer (pH ~7,4).

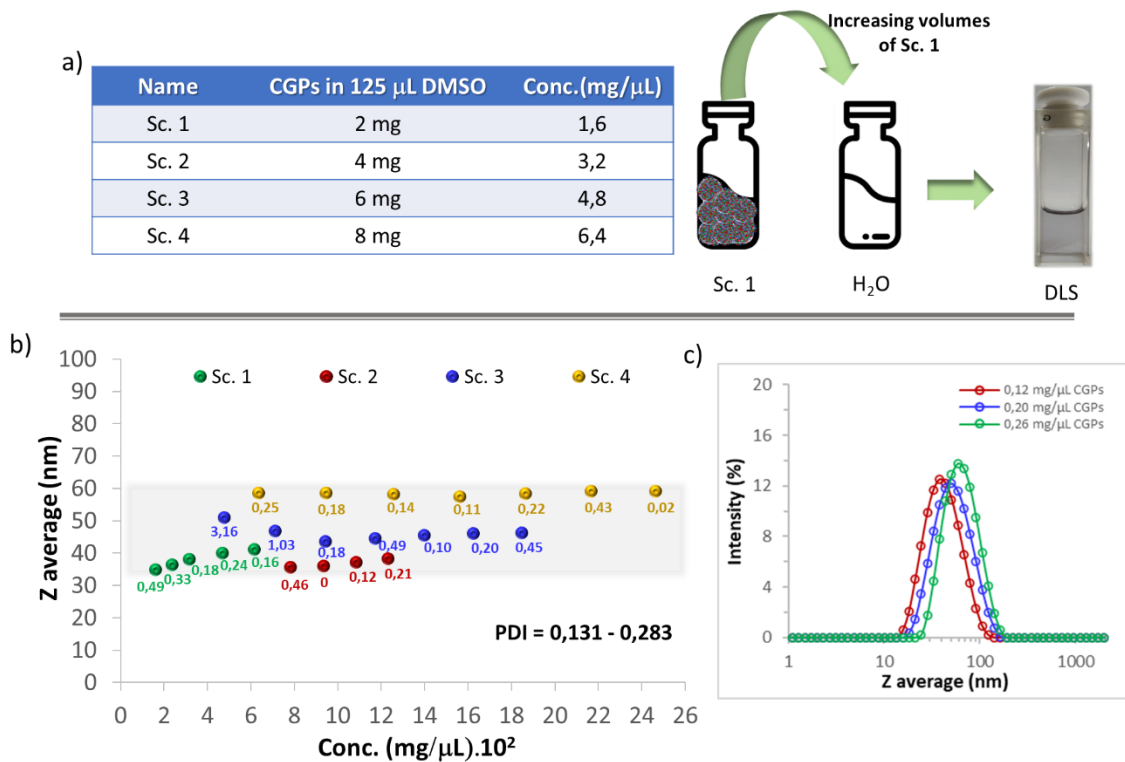

Figure S9. Figure S9. DLS measurements (represented as Z-average mean size) of different concentrations of CGPs/DMSO solutions in H<sub>2</sub>O. Standard deviation values are indicated below each data point.

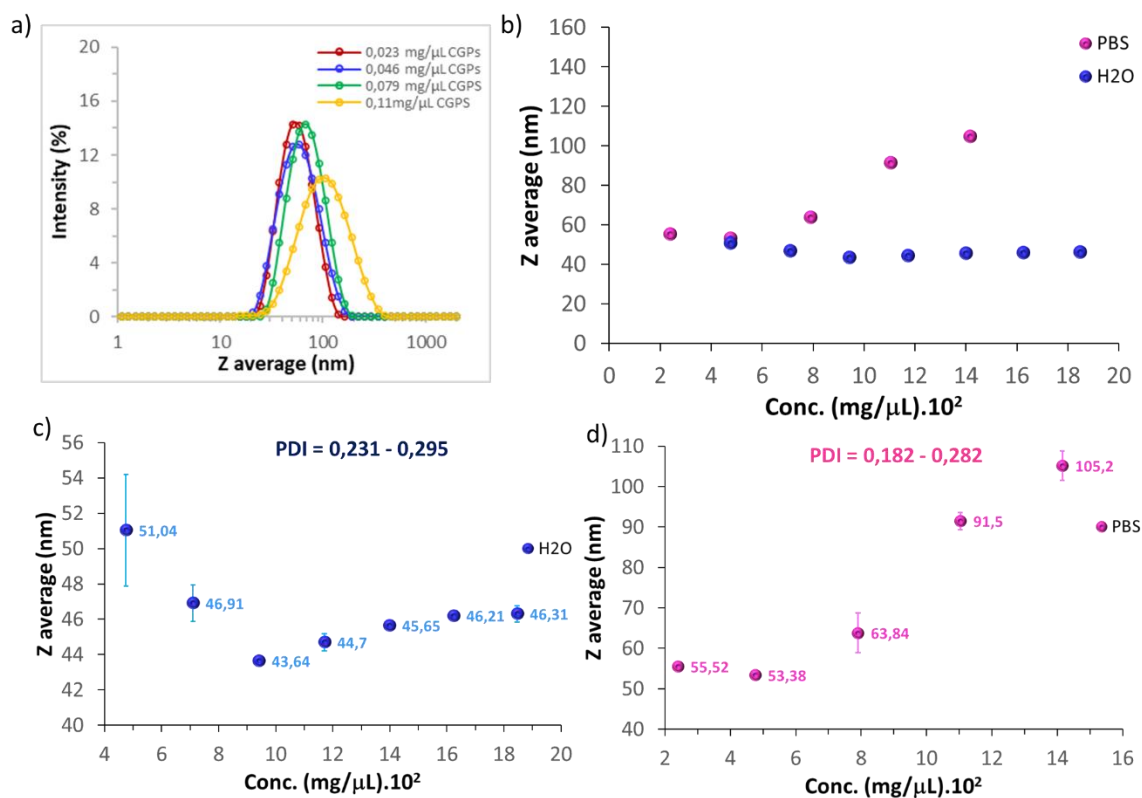

**Figure S10.** a) DLS measurements (represented as Z-average mean size) of different concentrations of CGPs/DMSO solutions in PBS buffer (pH ~ 7.4); b) A comparison depicting the Z-average mean size of distinct concentrations of CGPs/DMSO in both H<sub>2</sub>O and PBS buffer solutions; c) The same graph as in b), illustrating an upward extension on the y-axis from 40 to 56 nm, highlighting the standard deviation values for each measurement and the PDI range; d) The identical graph as in b), displaying an upward extension on the y-axis from 40 to 110 nm, accentuating the standard deviation values for each measurement and the PDI range.

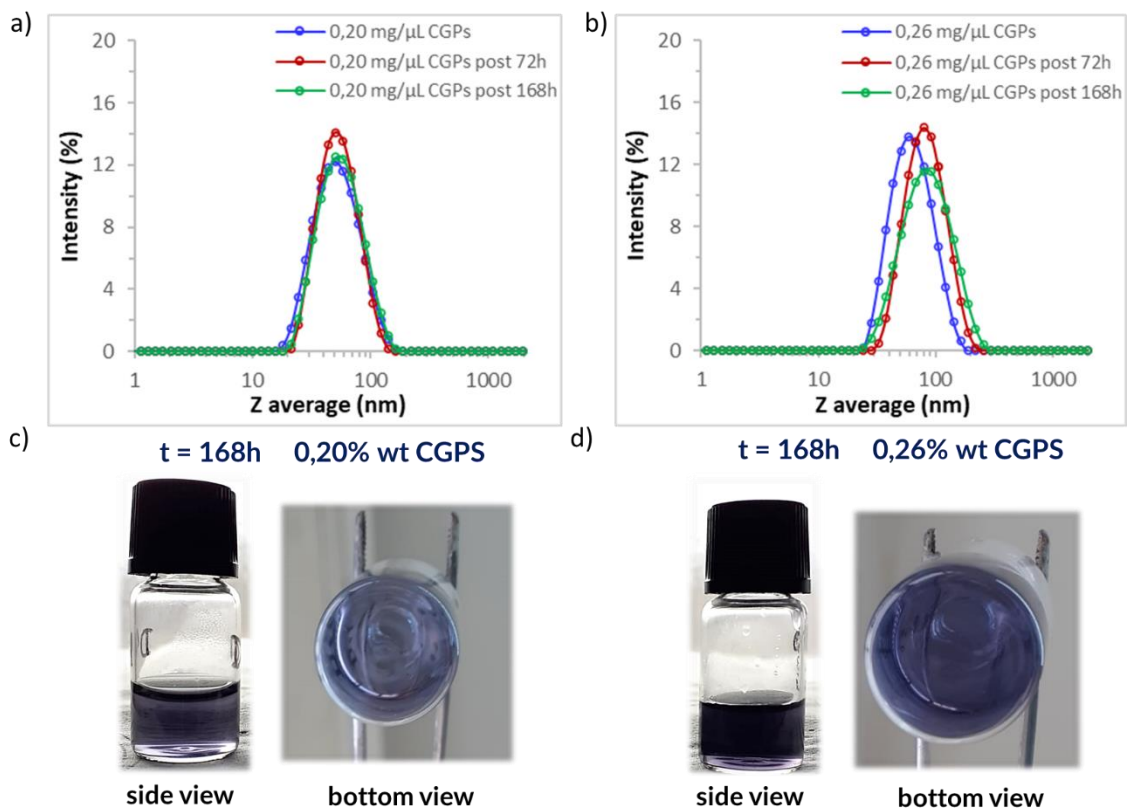

**Figure S11.** DLS (represented in Z average) of different concentrations of CGPs/DMSO solutions in H<sub>2</sub>O at t = 0 h, t = 72 h and t = 168 h.

## S6. Characterization of compounds 1

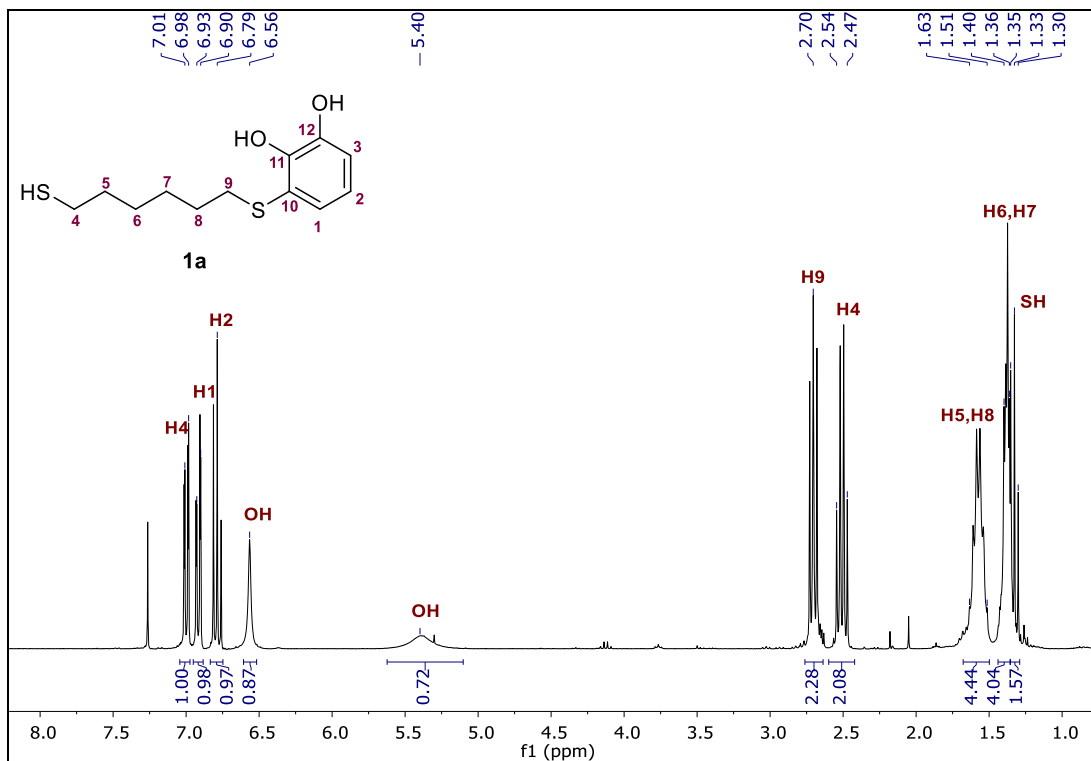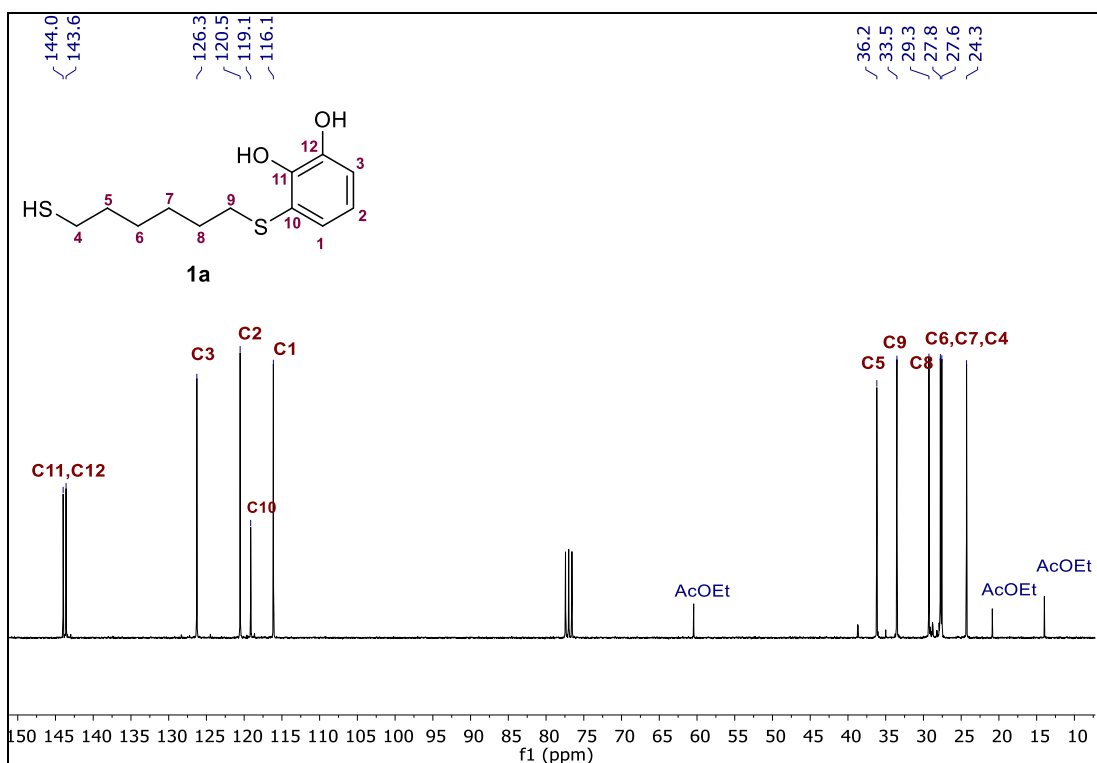

**Figure S13.  $^{13}\text{C}$  NMR of **1a** in  $\text{CDCl}_3$**



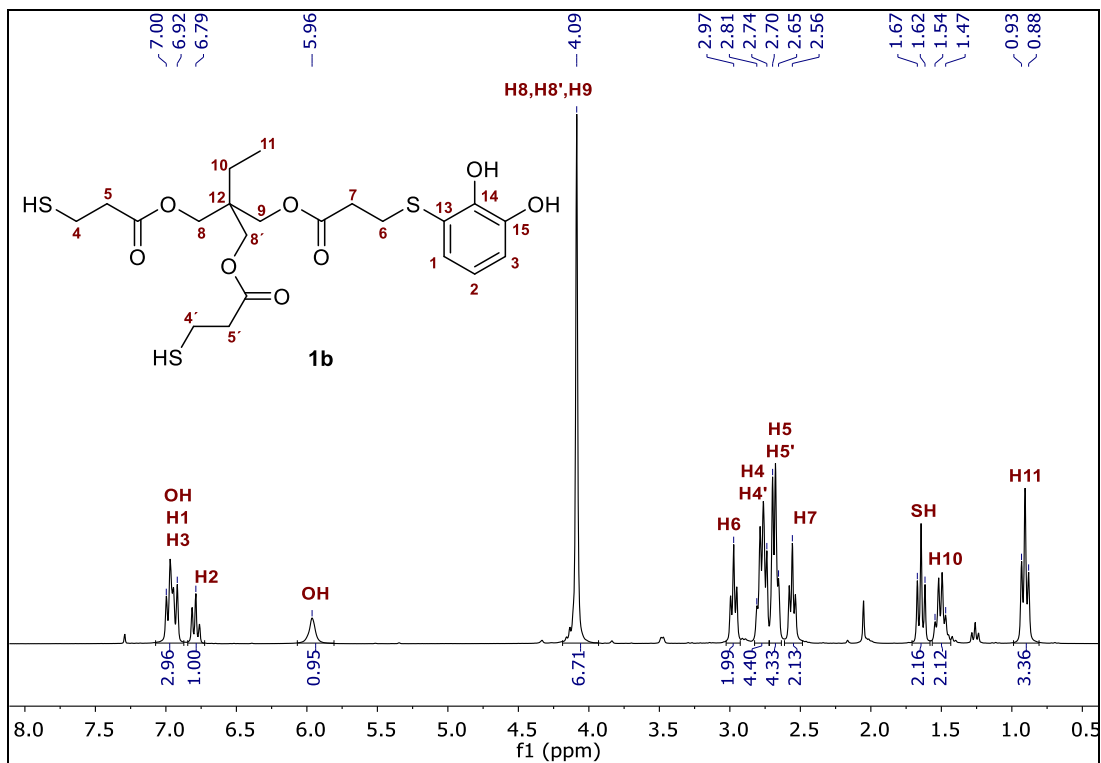

Figure S14. <sup>1</sup>H NMR of 1b in CDCl<sub>3</sub>

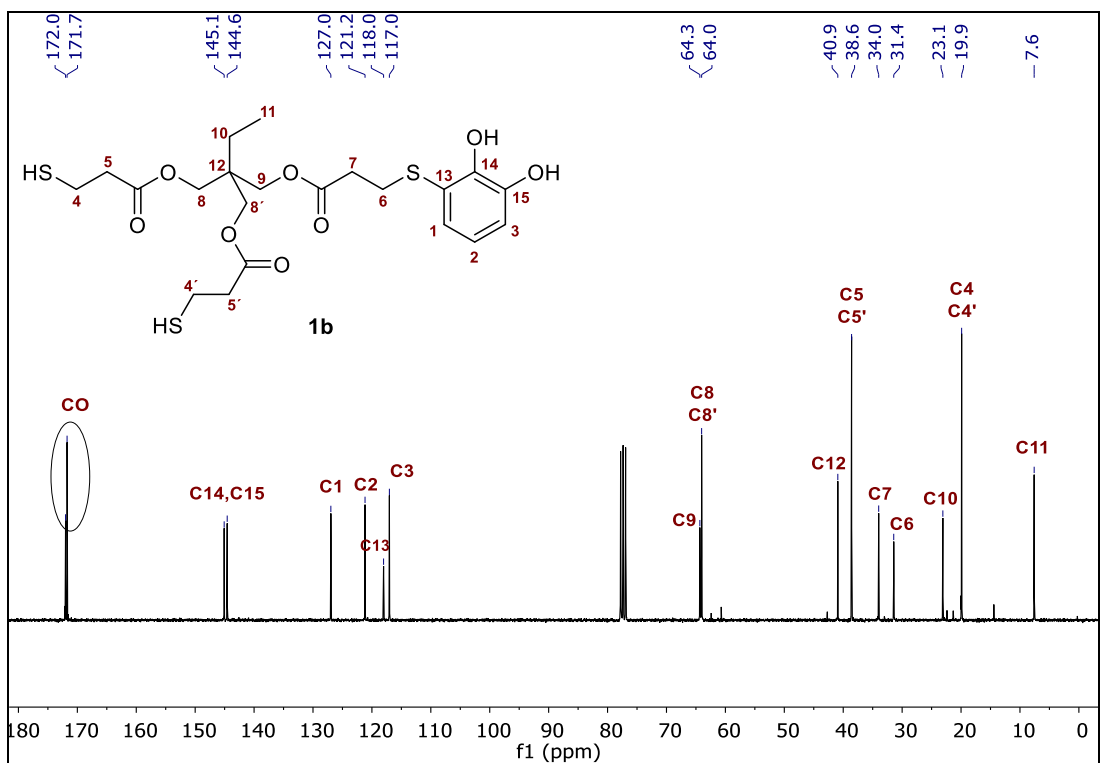

Figure S15. <sup>13</sup>C NMR of 1b in CDCl<sub>3</sub>

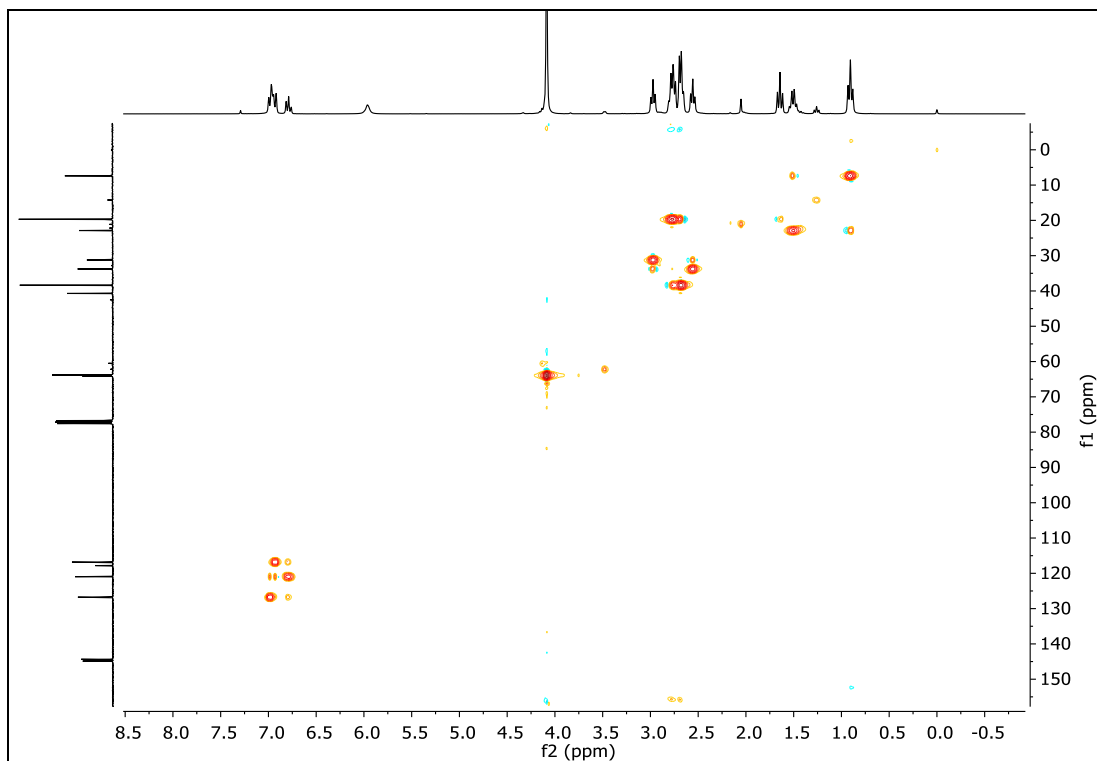

Figure S16. HSQC of **1b** in  $\text{CDCl}_3$

## S7. Characterization of compounds **2**

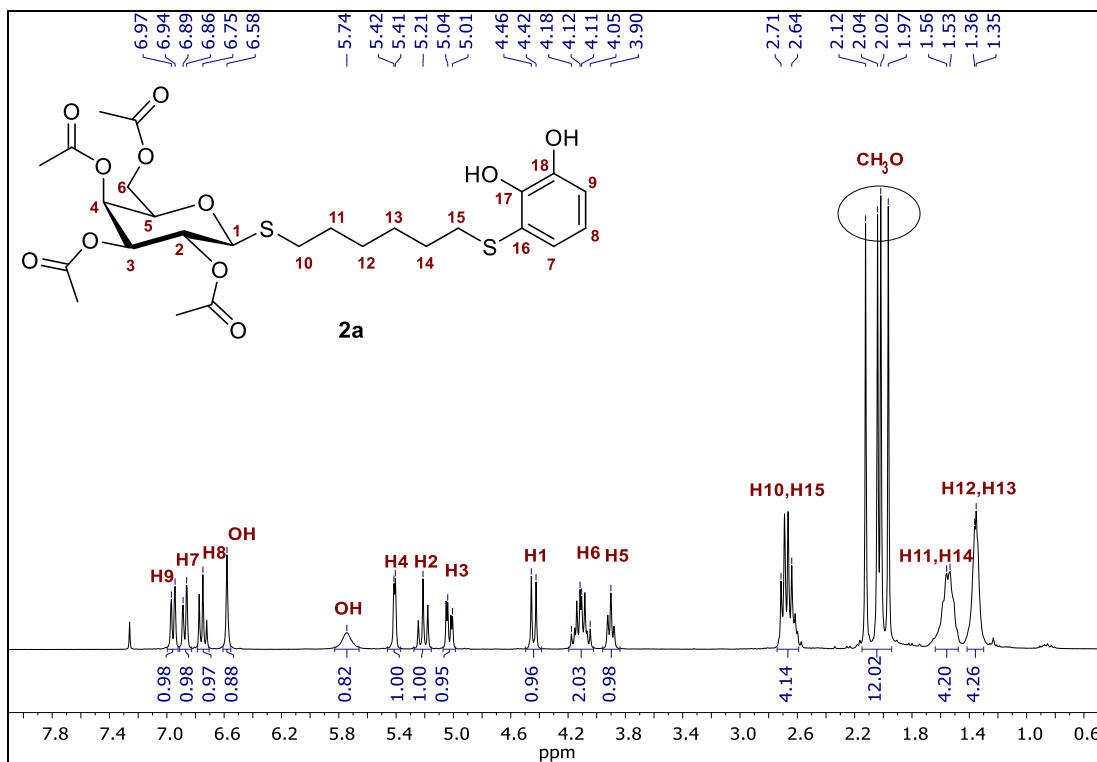

Figure S17.  $^1\text{H}$  NMR of **2a** in  $\text{CDCl}_3$

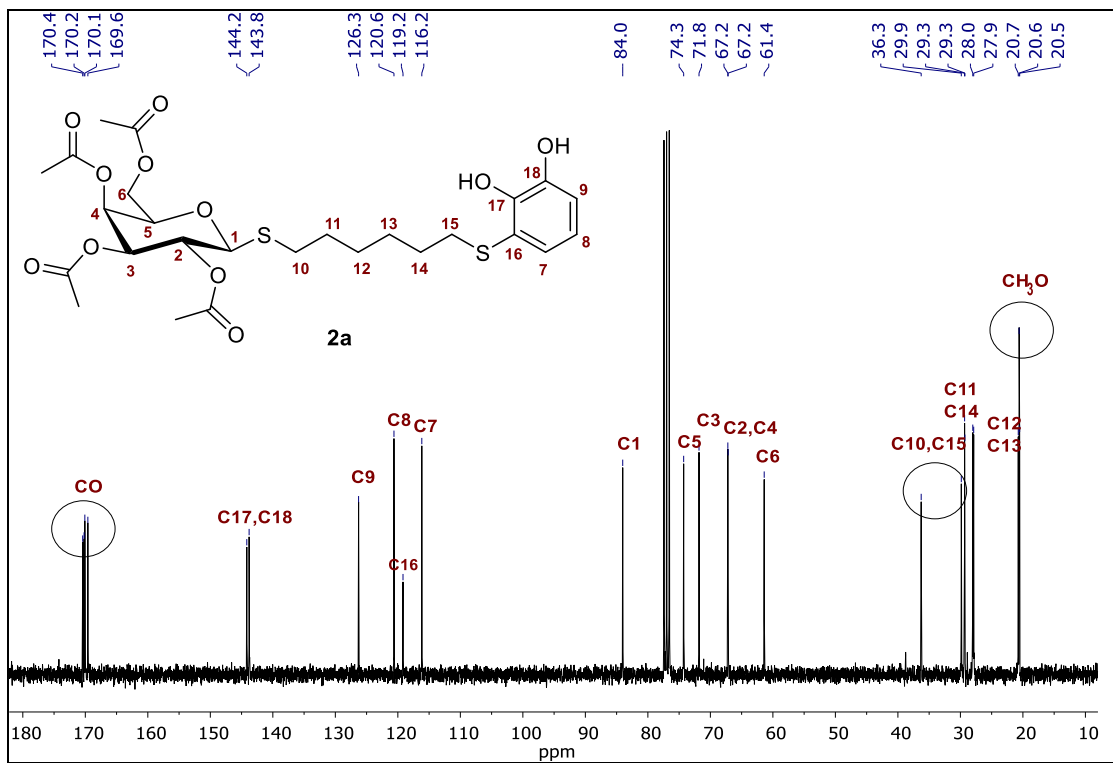

Figure S18.  $^{13}\text{C}$  NMR of **2a** in  $\text{CDCl}_3$

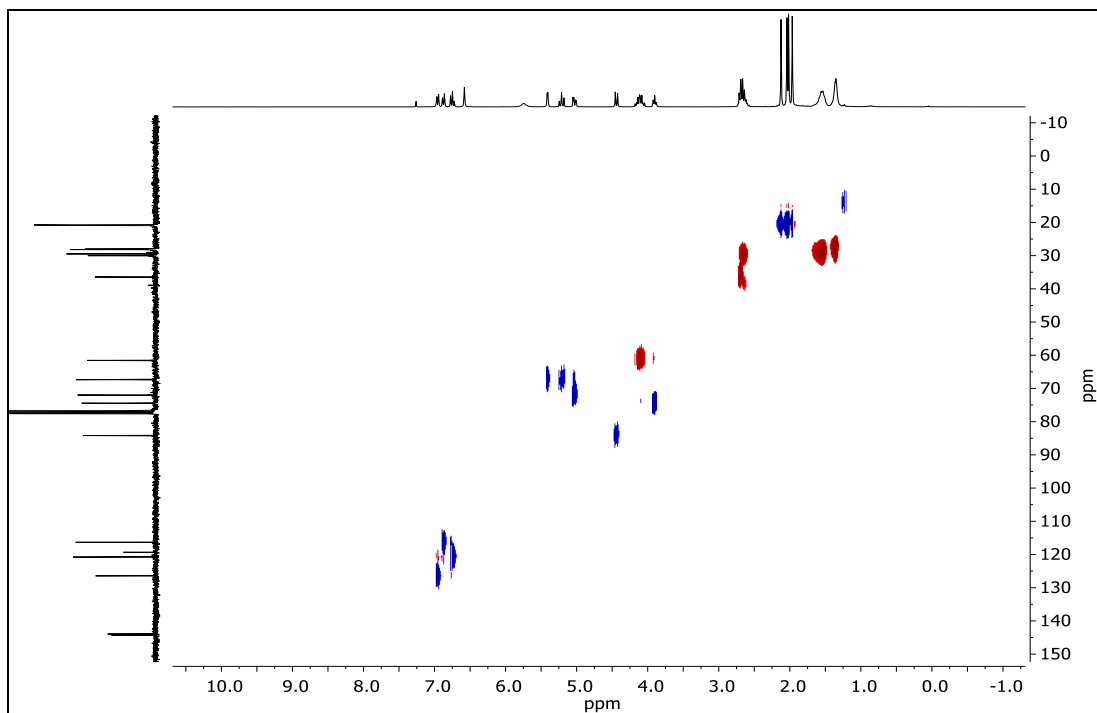

Figure S19. HSQC of **2a** in  $\text{CDCl}_3$

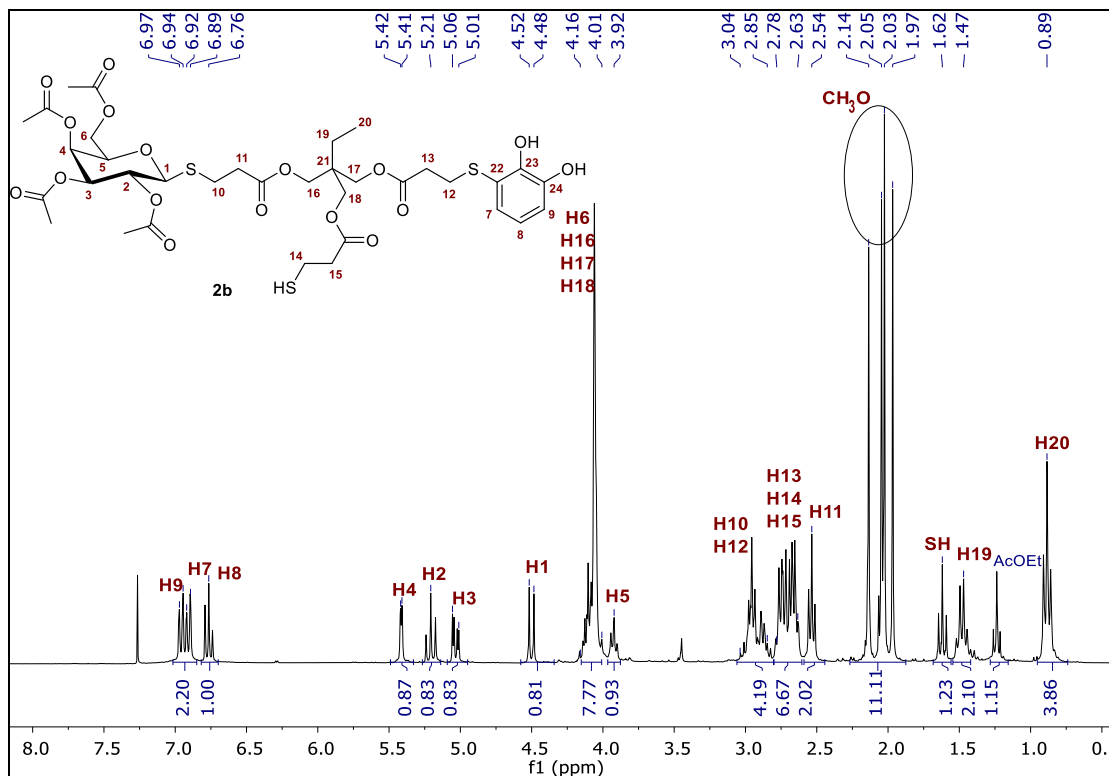

Figure S20.  $^1\text{H}$  NMR of 2b in  $\text{CDCl}_3$

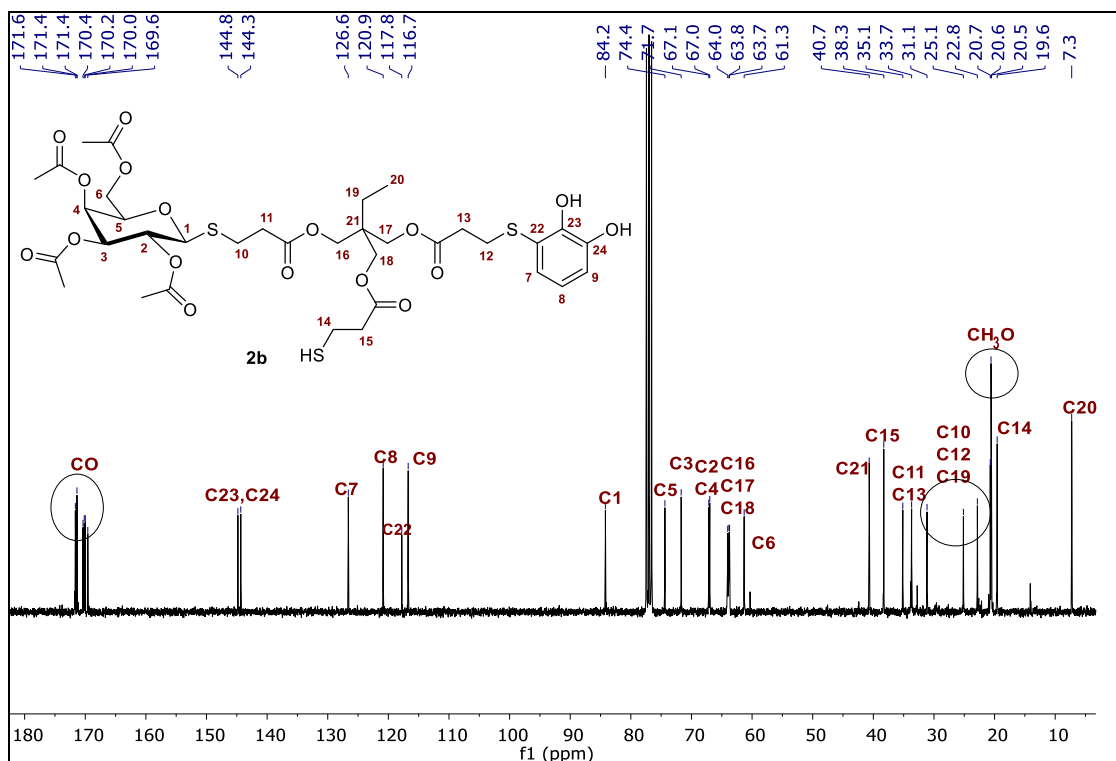

Figure S21.  $^{13}\text{C}$  NMR of 2b in  $\text{CDCl}_3$

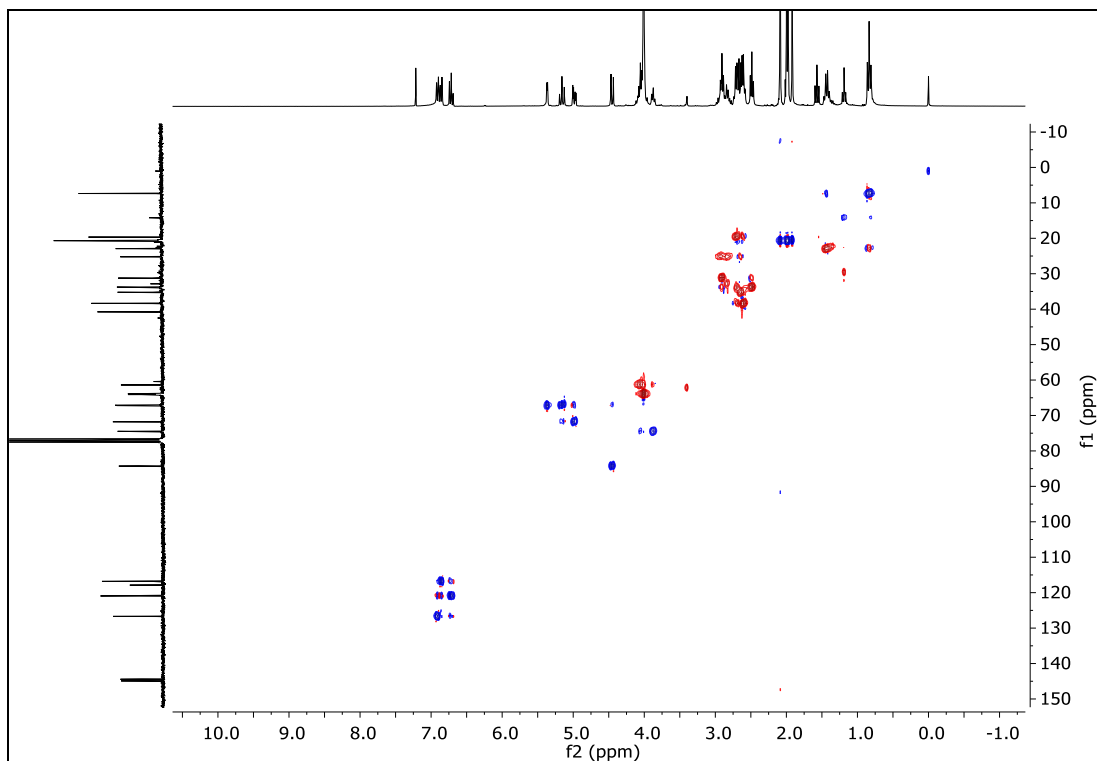

Figure S22. HSQC of **2b** in  $\text{CDCl}_3$

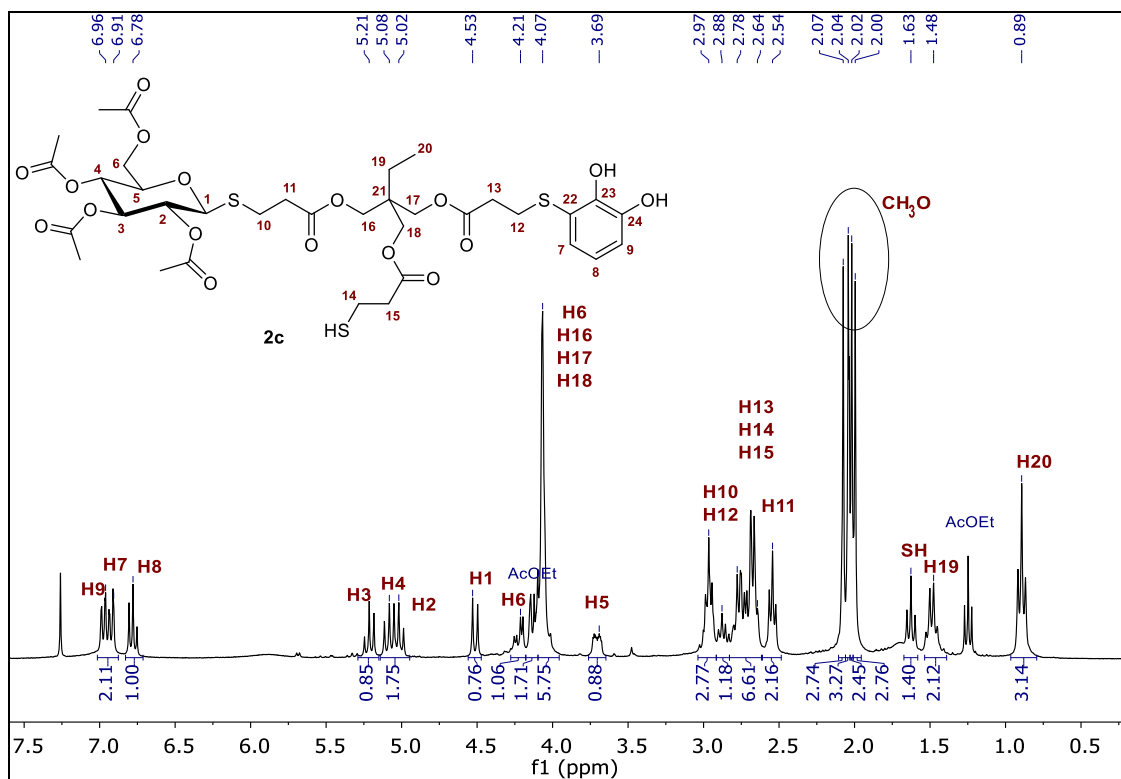

Figure S23.  $^1\text{H}$  NMR of **2c** in  $\text{CDCl}_3$

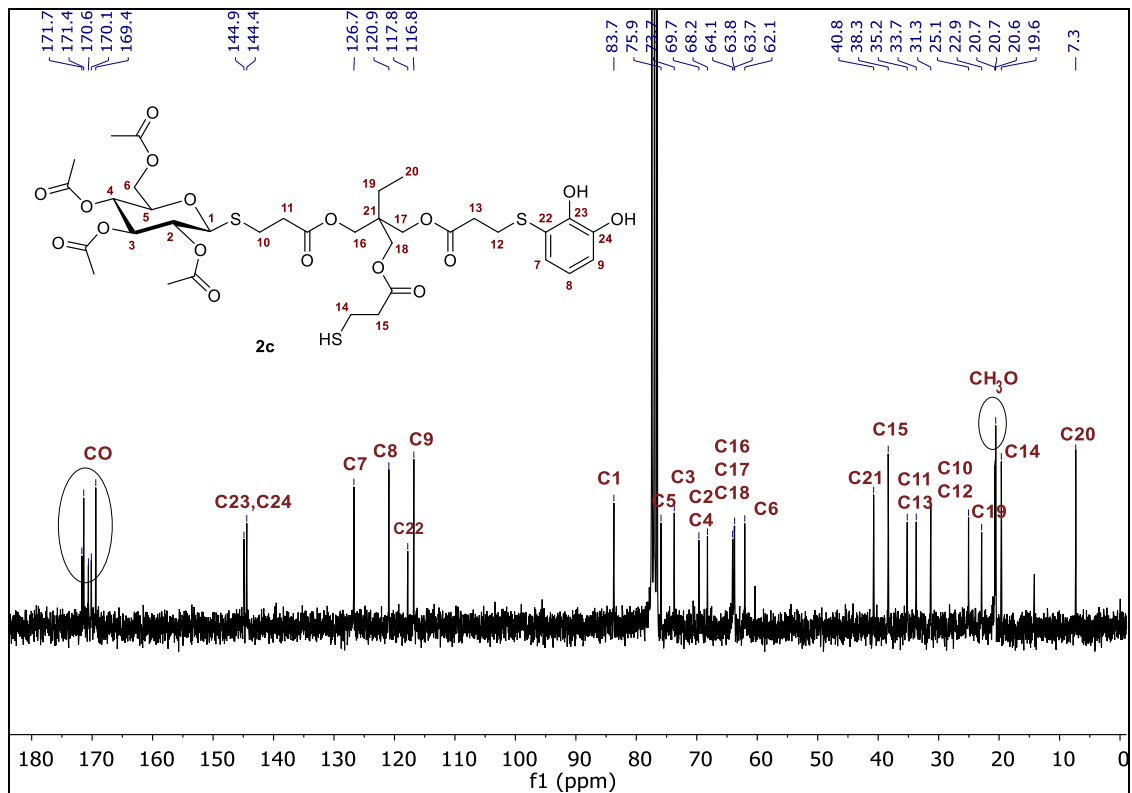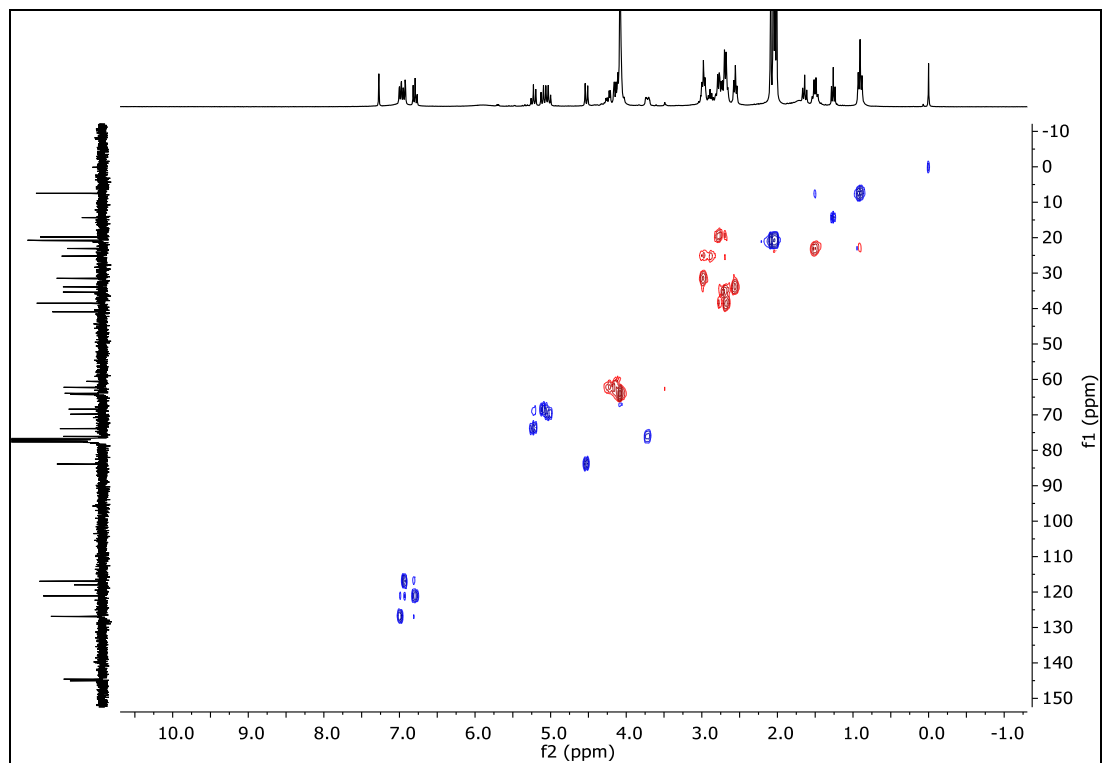

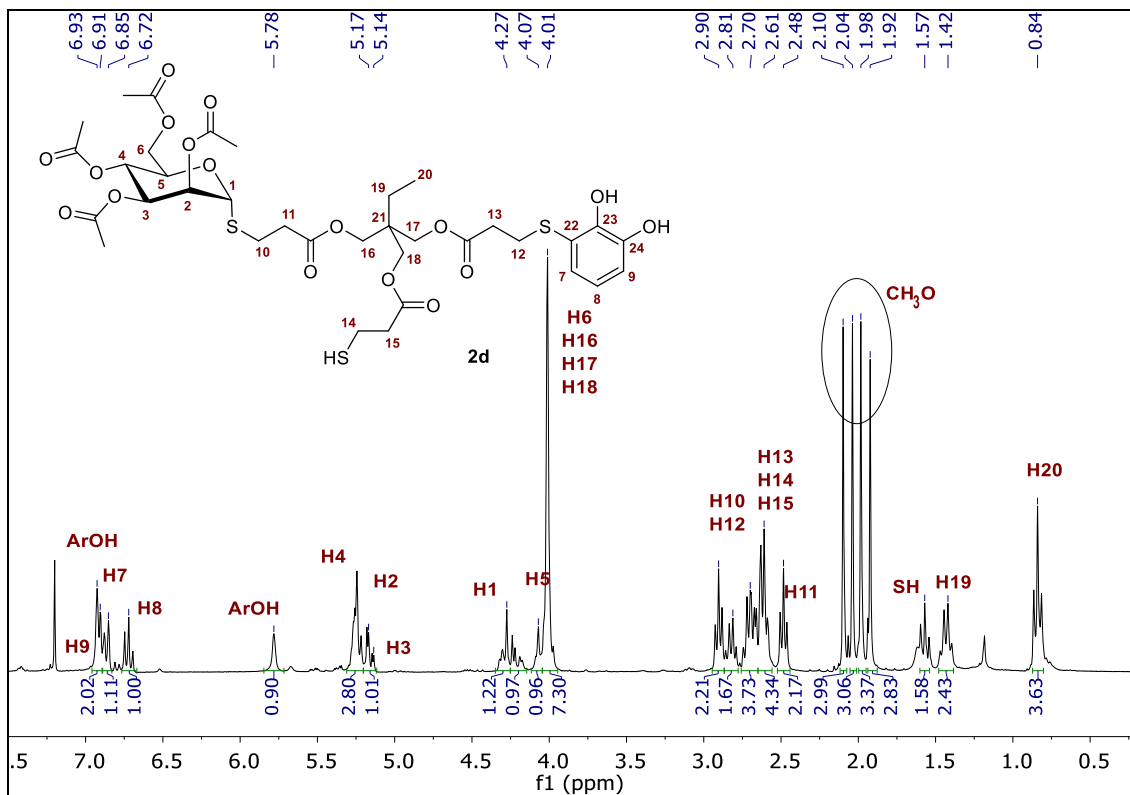

Figure S26. <sup>1</sup>H NMR of 2d in CDCl<sub>3</sub>

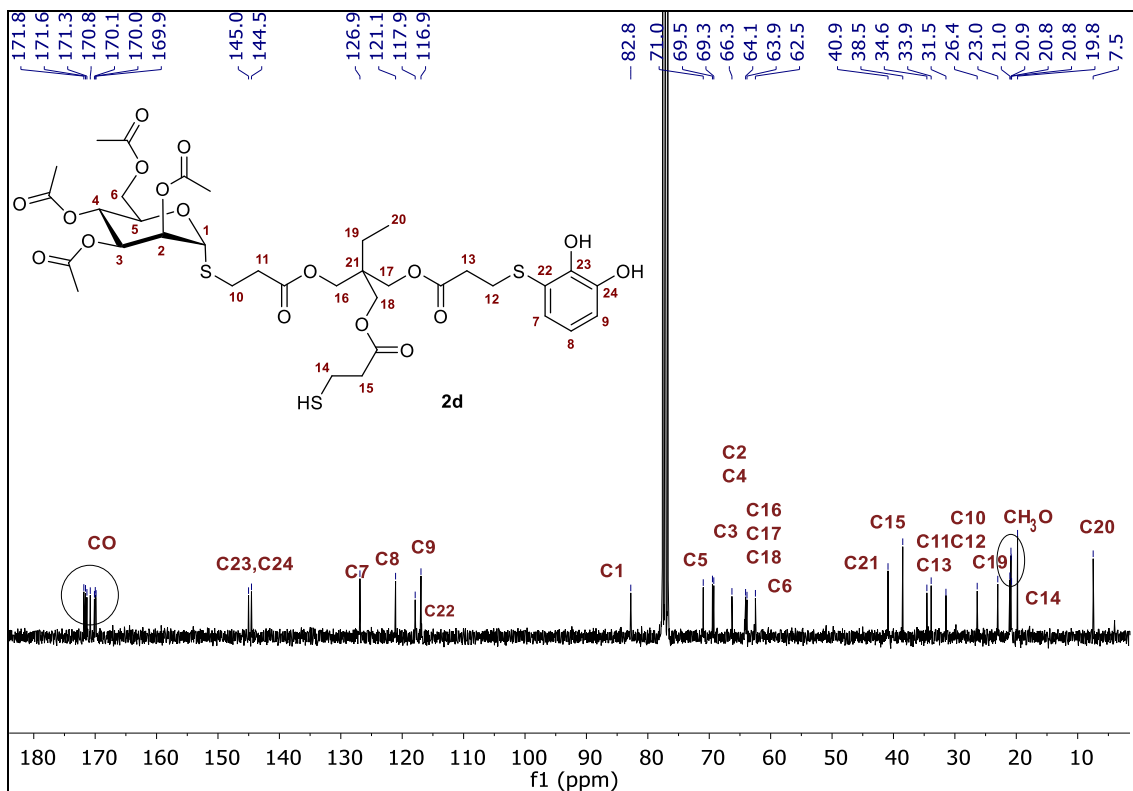

Figure S27. <sup>13</sup>C NMR of 2d in CDCl<sub>3</sub>

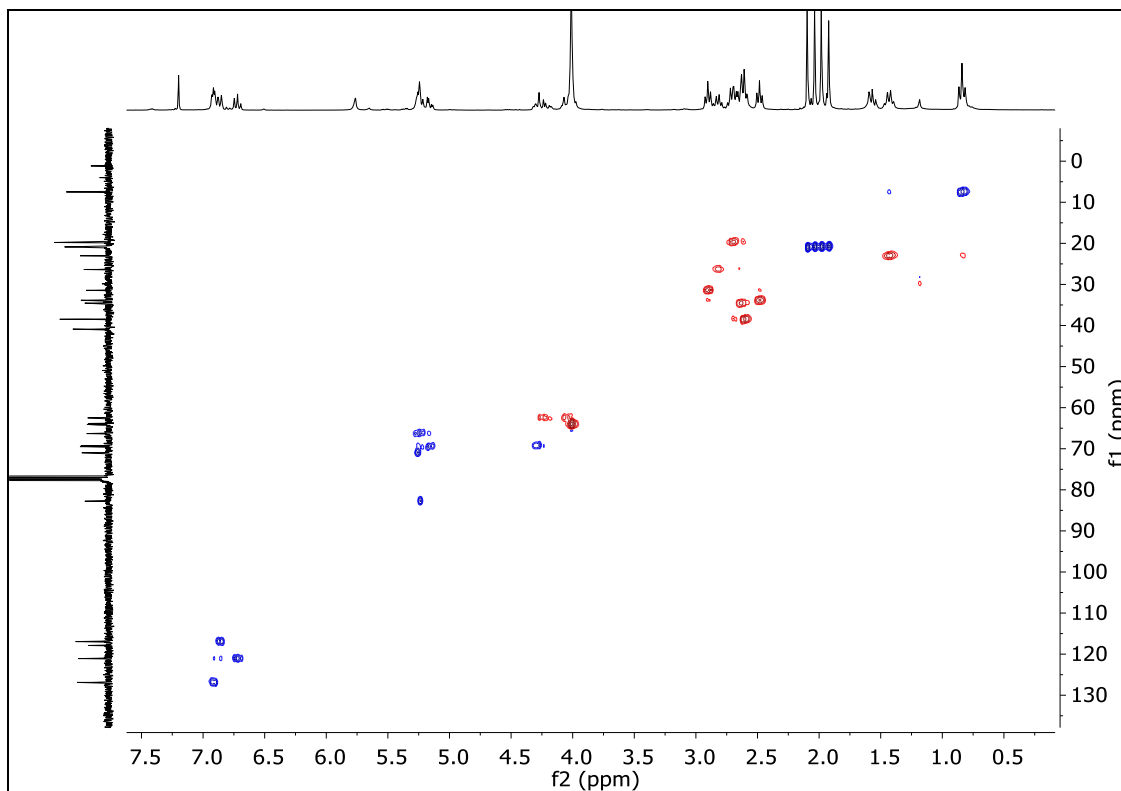

Figure S28. HSQC of **2d** in  $\text{CDCl}_3$

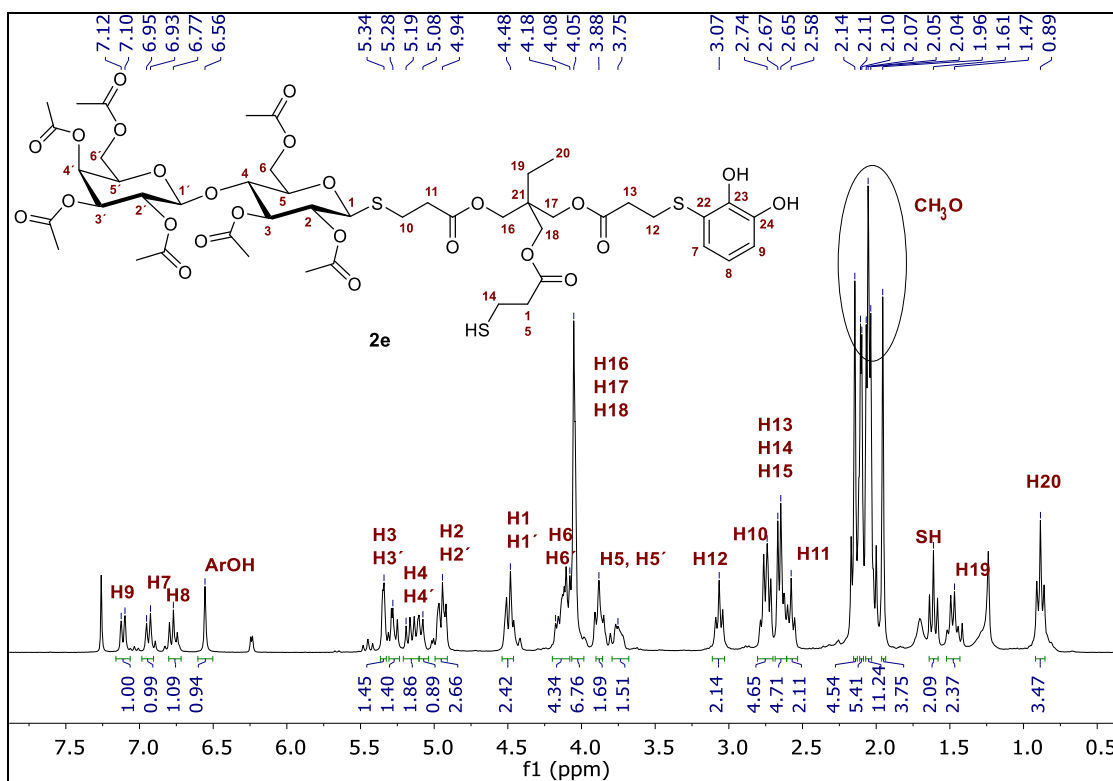

Figure S29.  $^1\text{H}$  NMR of **2e** in  $\text{CDCl}_3$



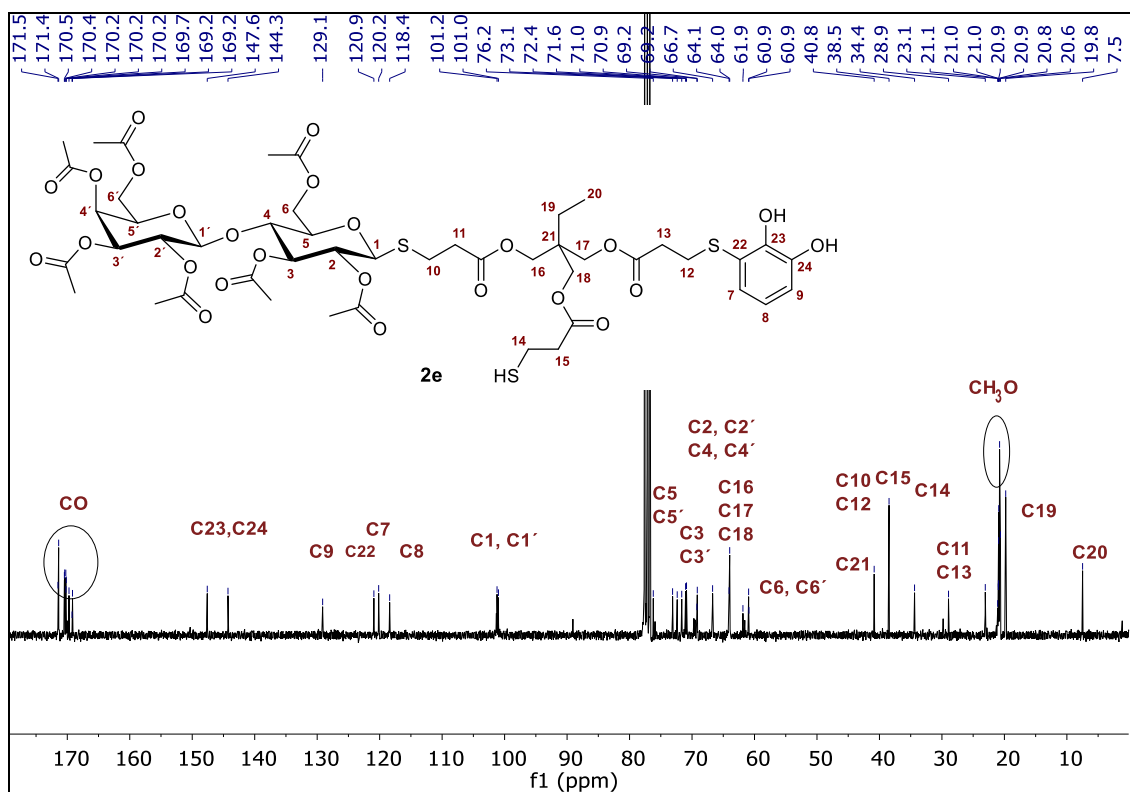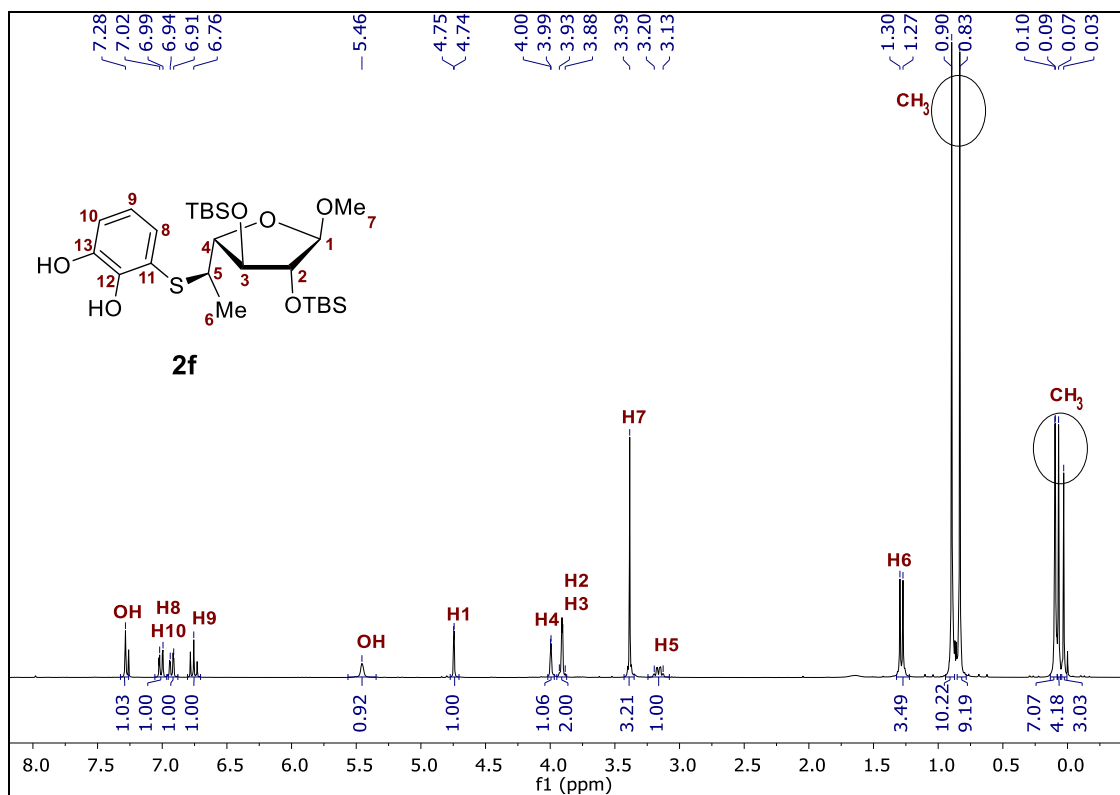

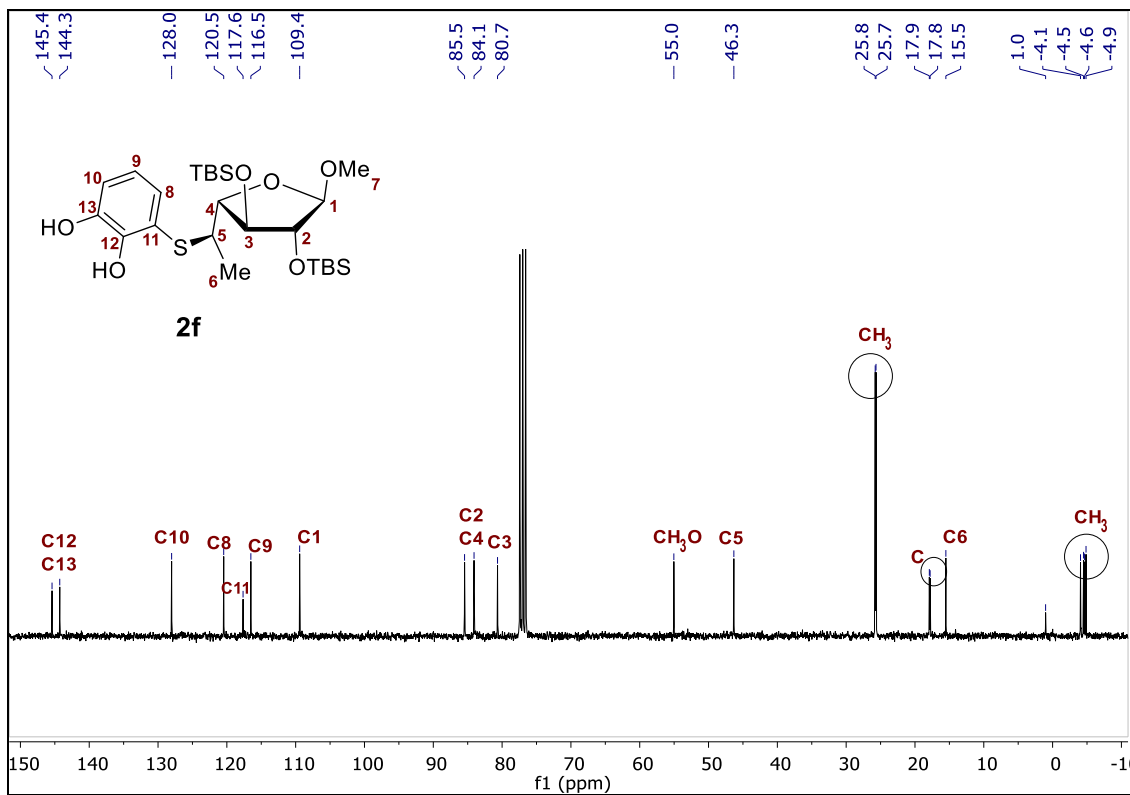

### S8. Characterization of compounds 3

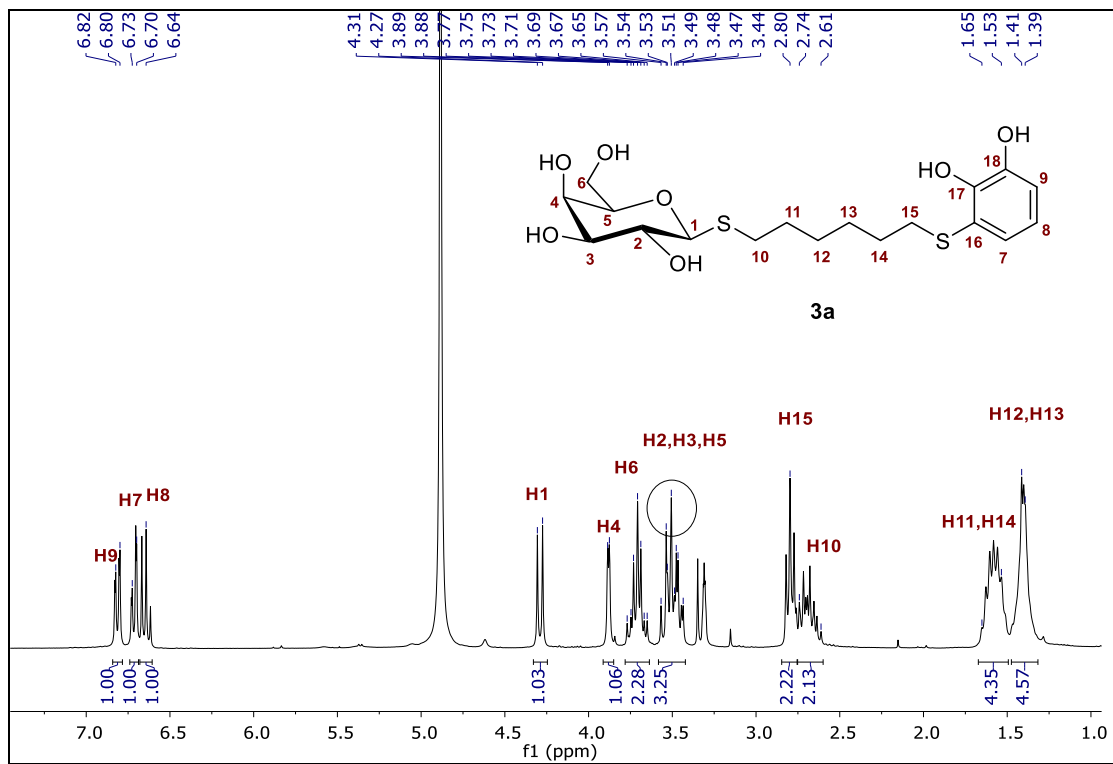

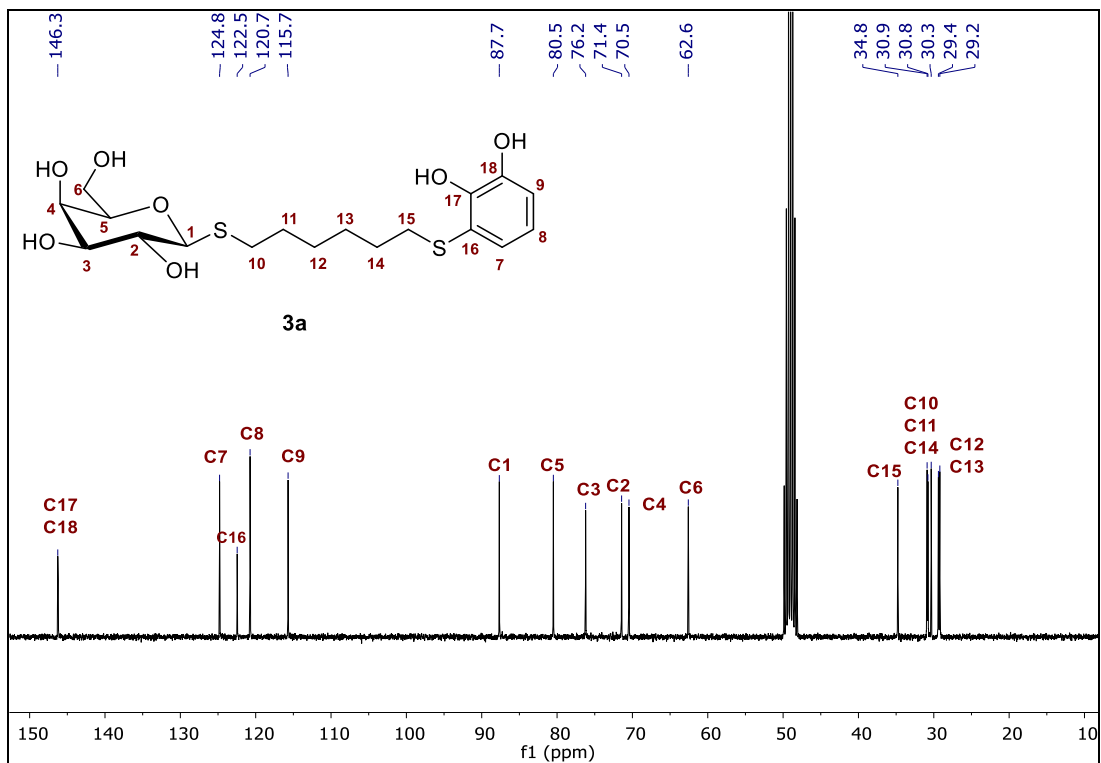

Figure S34.  $^{13}\text{C}$  NMR of **3a** in  $\text{CD}_3\text{OD}$

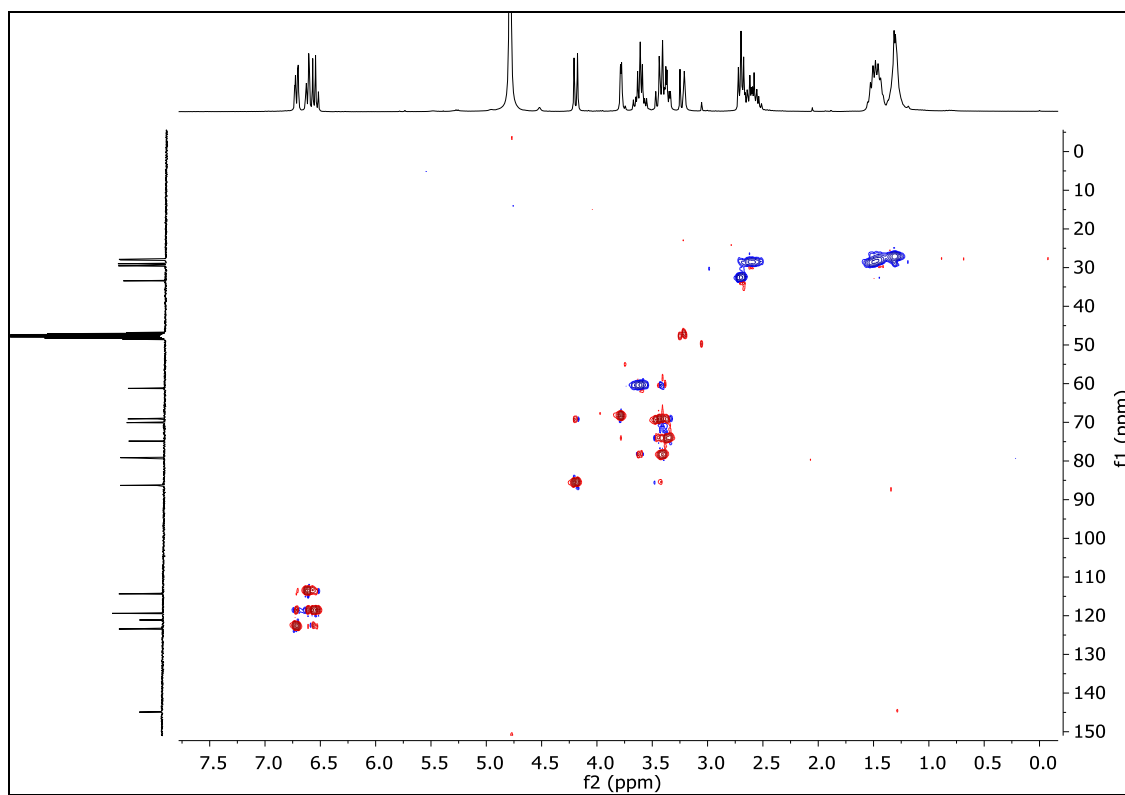

Figure S35. HSQC of **3a** in  $\text{CD}_3\text{OD}$

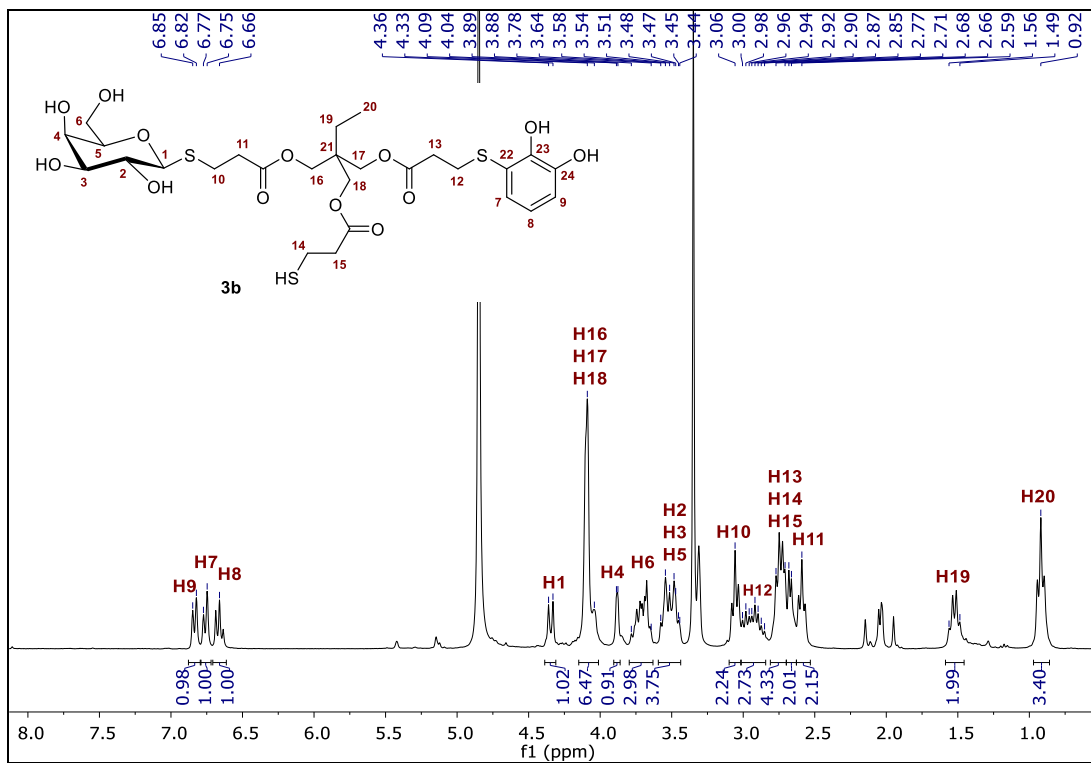

Figure S36. <sup>1</sup>H NMR of 3b in CD<sub>3</sub>OD

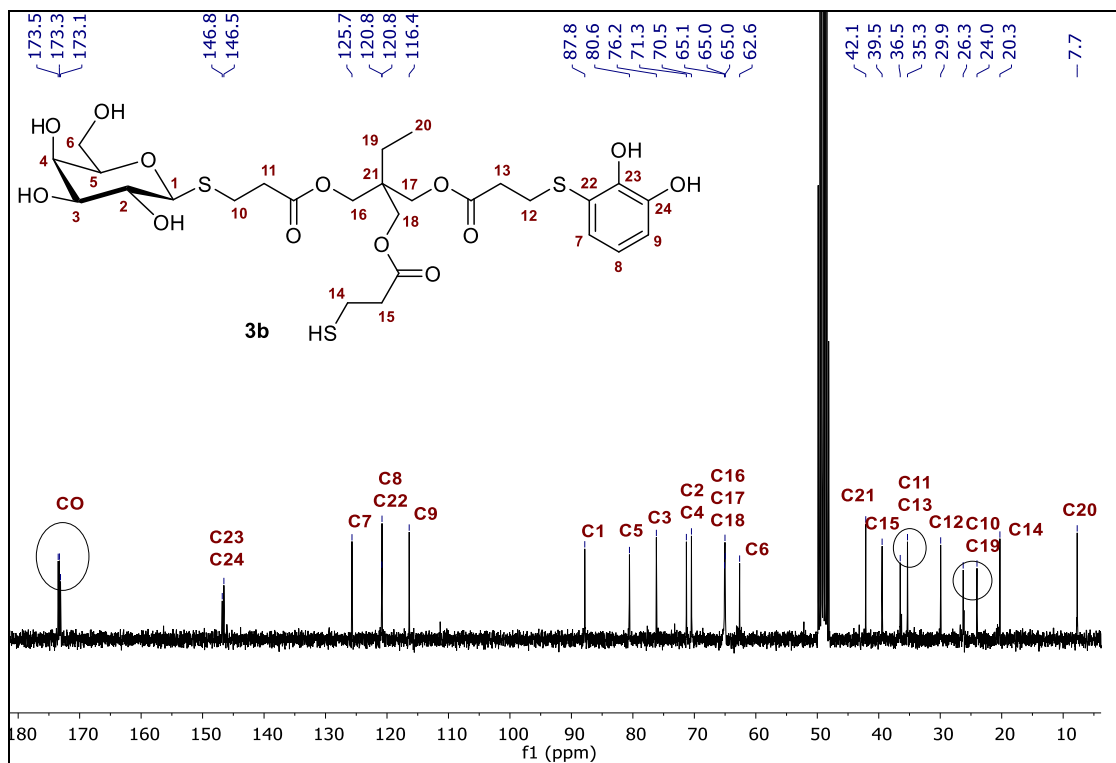

Figure S37. <sup>13</sup>C NMR of 3b in CD<sub>3</sub>OD

S9. Characterization of compounds 4

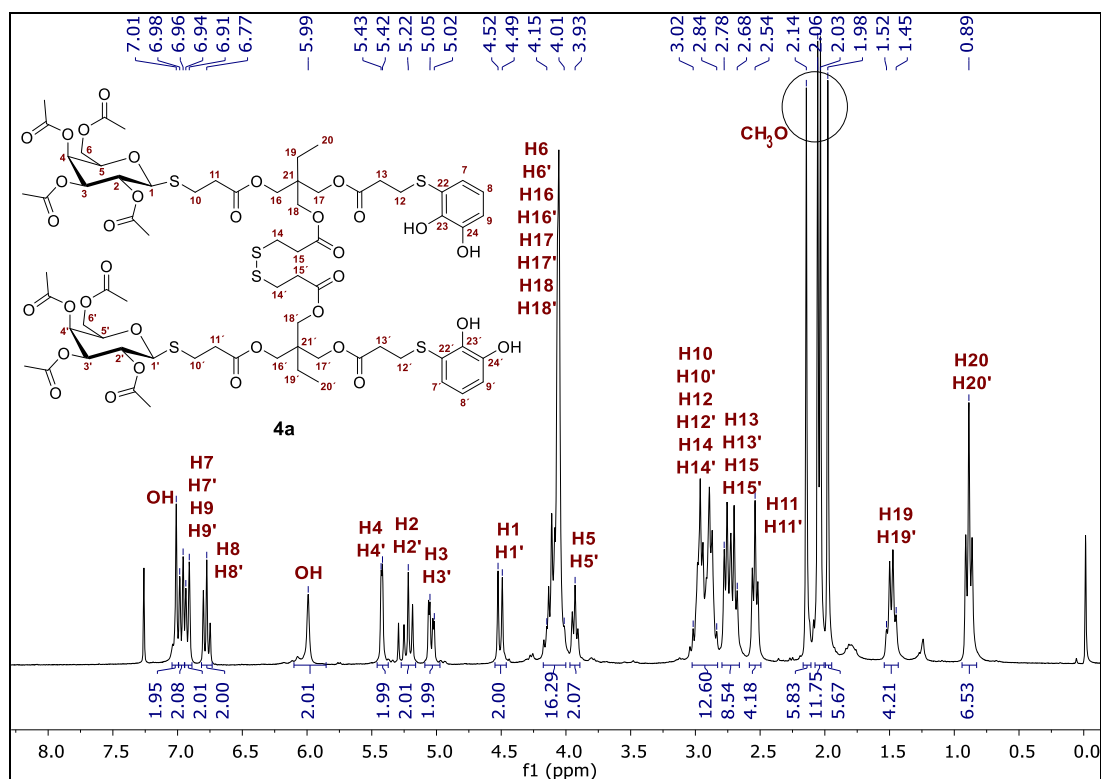

Figure S38. <sup>1</sup>H NMR of 4a in CDCl<sub>3</sub>

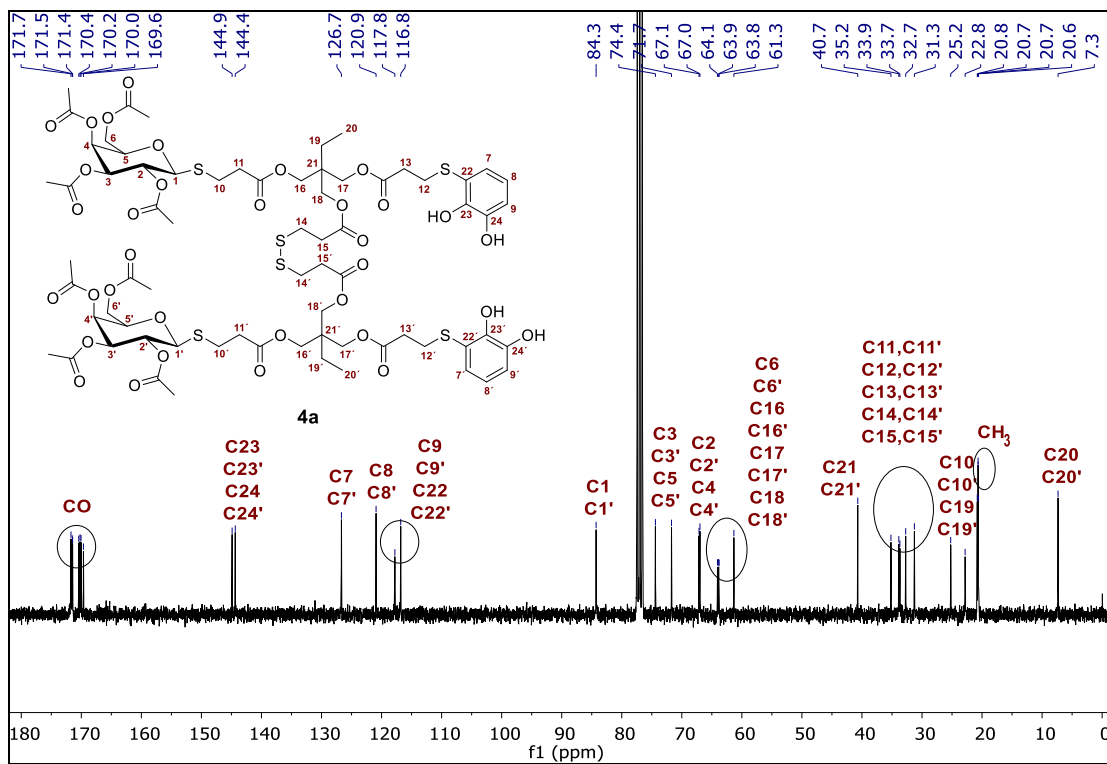

Figure S39. <sup>13</sup>C NMR of 4a in CDCl<sub>3</sub>
